# Supplementary material for: Revolutionizing energy storage with advanced reduced graphene oxide-wrapped MnSe@CoSe@FeSe2 nanowires
Source: Royal Society of Chemistry journal article supplement (doi:10.1039/d4dt01909a), 2024-01-01
Supplement: d4dt01909a1.pdf [file d4dt01909a1.pdf]

## Supporting Information

# Revolutionizing energy storage with advanced reduced graphene oxide-wrapped MnSe@CoSe@FeSe<sub>2</sub> nanowires

Akbar Mohammadi Zardkhoshoui<sup>1\*</sup> and Saied Saeed Hosseiny Davarani<sup>2\*</sup>

<sup>1</sup>Department of Chemical Technologies, Iranian Research Organization for Science and Technology, Tehran 3313193685, Iran.

<sup>2</sup>Department of Chemistry, Shahid Beheshti University, G. C., 1983963113, Evin, Tehran, Iran.

Corresponding authors: \*<sup>1</sup>Tel: +98 21 56276283; Fax: +98 21 56276265; E-mail: A\_mohammadi@irost.ir (A. Mohammadi Zardkhoshoui) and \*<sup>2</sup>Tel: +98 21 22431661; Fax: +98 21 22431661; E-mail: [ss-hosseiny@sbu.ac.ir](mailto:ss-hosseiny@sbu.ac.ir) (S.S.H. Davarani).

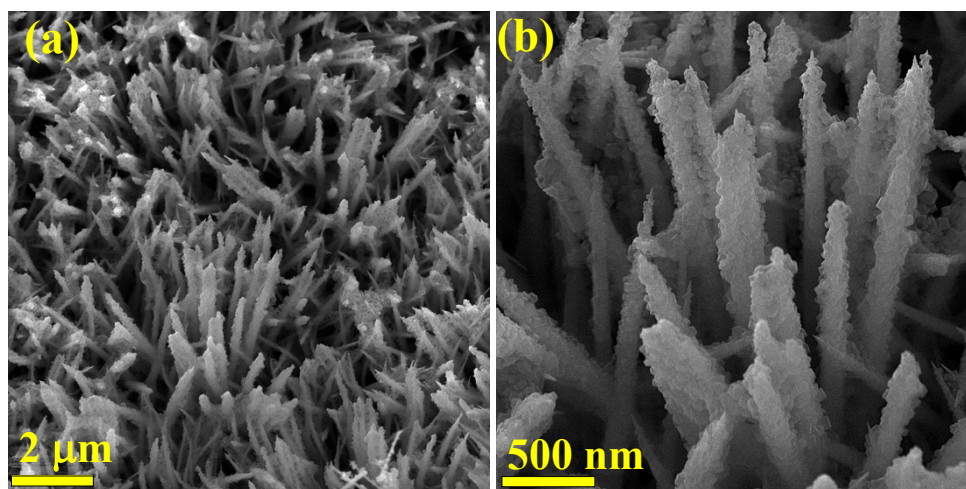

**Fig. S1** (a, b) FESEM images of the NF@MCFS300.

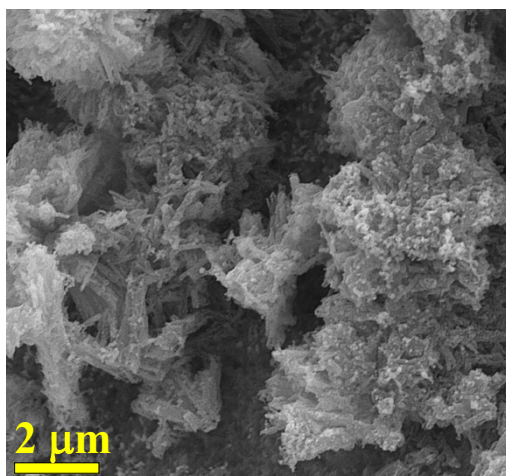

Fig. S2 FESEM images of the NF@MCFS600.

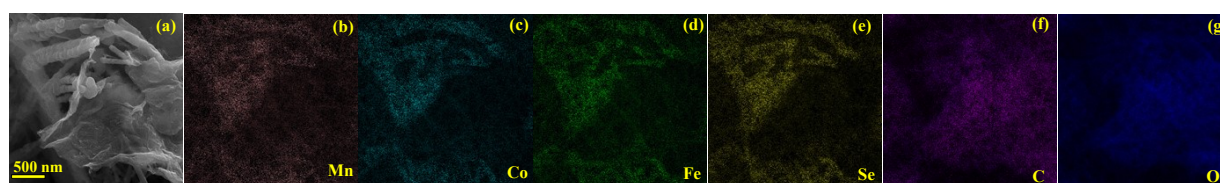

Fig. S3 FESEM mapping images of the NF@MCFS500-rGO.

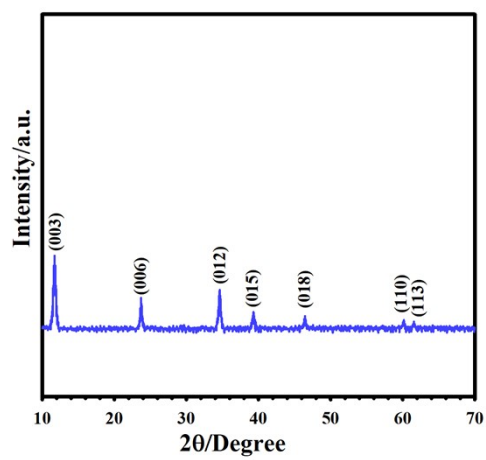

Fig. S4 XRD pattern of the MCFLDH.

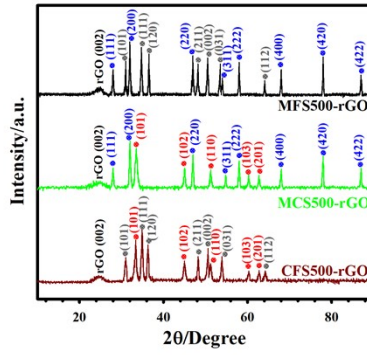

Fig. S5 XRD patterns of the MFS500-rGO, CFS500-rGO, and MCS500-rGO.

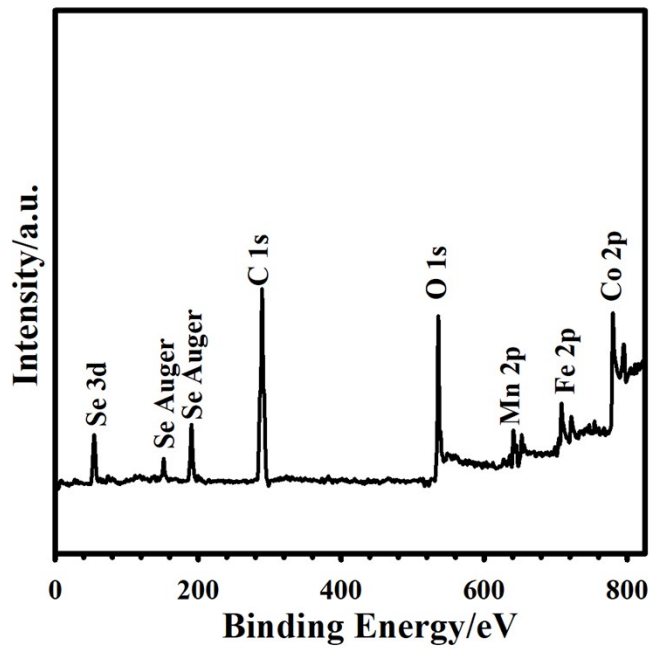

Fig. S6 Comprehensive XPS profile of the MCFS500-rGO.

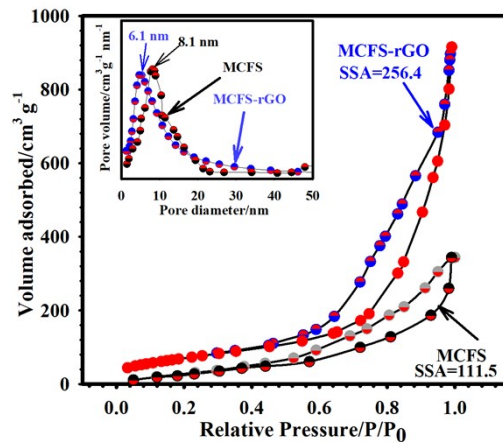

**Fig. S7** BET graphs of the MCFS500-rGO and MCFS500 along with their corresponding BJH graphs (inset).

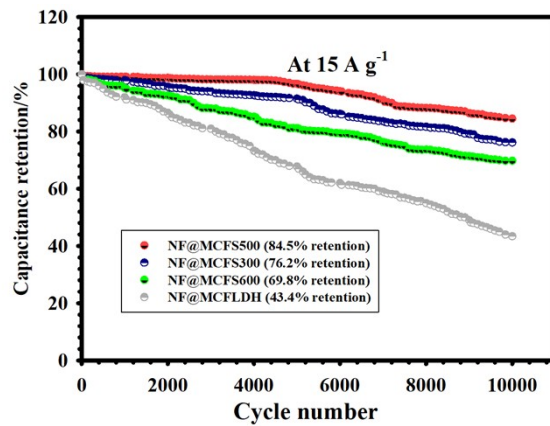

**Fig. S8** Longevity of the NF@MCFLDH, NF@MCFS300, NF@MCFS500, and NF@MCFS600 electrodes at 15 A g<sup>-1</sup>.

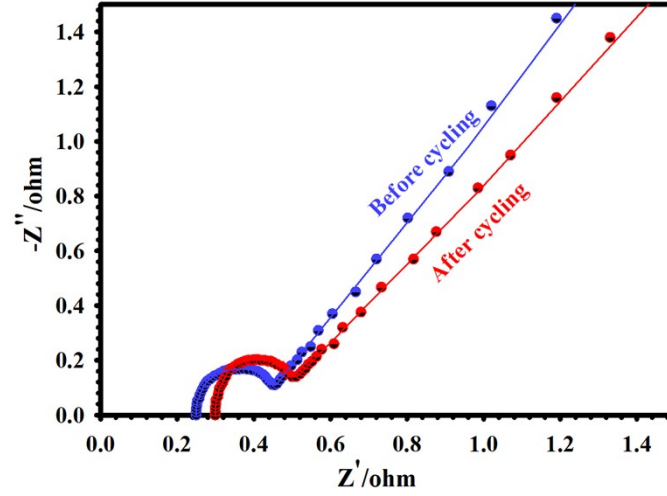

Fig. S9 EIS curves of the NF@MCFS500-rGO before and after 10000 cycles.

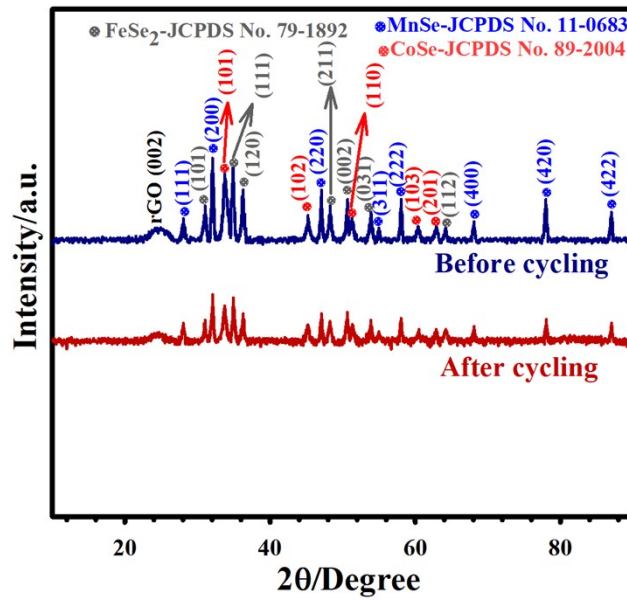

Fig. S10 XRD pattern of the MCFS500-rGO before and after 10000 GCD cycles.

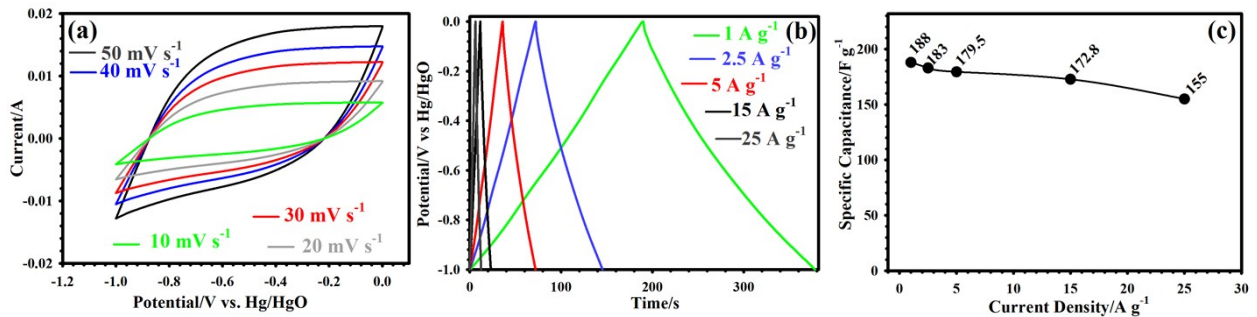

**Fig. S11** (a) CV plots of the AC from 10 to 50 mV s<sup>-1</sup>. (b) GCD plots of the AC from 1 to 25 A g<sup>-1</sup>. (c) Rate capability of the AC electrode.

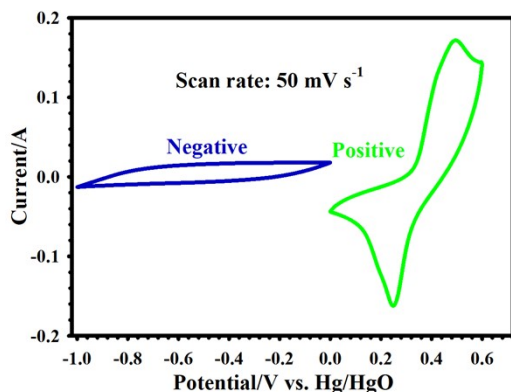

**Fig S. 12** CV plots of AC (negative electrode) and NF@MCFS500-rGO (positive electrode) at 50 mV s<sup>-1</sup> in three-electrode cell.

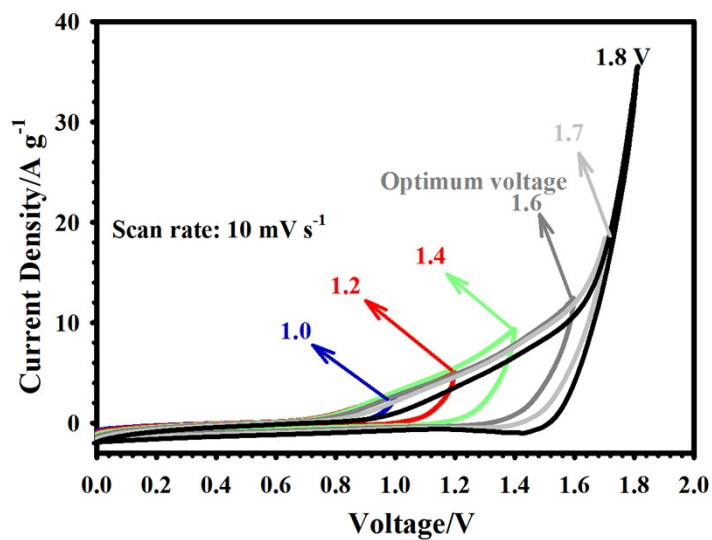

**Fig. S13** CV plots of the AC/NF@MCFS500-rGO at various potential window at 10 mV s<sup>-1</sup> from 1.0 to 1.8 V.

**Table S1.** Comparison of the supercapacitive performance of the NF@MCFS500-rGO with other

| Composition                                        | Capacitance (F/g)             | Cycles, retention   | Rate capability                | ED (Wh kg <sup>-1</sup> ) | Reference |
|----------------------------------------------------|-------------------------------|---------------------|--------------------------------|---------------------------|-----------|
| NiSe-Ni <sub>0.85</sub> Se                         | 1486.6 at 1 A g <sup>-1</sup> | 5000, 80%           | 69% at 20 A g <sup>-1</sup>    | 41                        | 1         |
| CuSe@MnSe                                          | 1270.6 at 1 A g <sup>-1</sup> | 7000, 91.62%        | 60.3% at 30 A g <sup>-1</sup>  | 19.54                     | 2         |
| Sn-Co(OH) <sub>2</sub>                             | 1441.8 at 1 A g <sup>-1</sup> | 5000, 84.3%         | 49.5% at 5 A g <sup>-1</sup>   | -                         | 3         |
| NiCoP/Co(OH) <sub>2</sub>                          | 1604 at 1 A g <sup>-1</sup>   | 5000, 91.1%         | 81.8% at 20 A g <sup>-1</sup>  | 38.4                      | 4         |
| Ni <sub>0.85</sub> Se                              | 1354 at 1 A g <sup>-1</sup>   | 300, 90%            | 49.55% at 30 A g <sup>-1</sup> | 40.7                      | 5         |
| MnCo <sub>2</sub> O <sub>4</sub> /MnO <sub>2</sub> | 1539 at 1 A g <sup>-1</sup>   | 10000, 95.5 %       | 51.2% at 20 A g <sup>-1</sup>  | 48.78                     | 6         |
| CoSe <sub>2</sub> /NC-NF                           | 1236.5 at 1 A g <sup>-1</sup> | 10000, 92%          | 61.2% at 20 A g <sup>-1</sup>  | 40.9                      | 7         |
| Cerium Selenide                                    | 451.4 at 1 A g <sup>-1</sup>  | 4000, 70.7%         | 65% at 15 A g <sup>-1</sup>    | 36.1                      | 8         |
| Co <sub>x</sub> Ni <sub>1-x</sub> Se               | 918.8 at 1 A g <sup>-1</sup>  | 4000, 83.9%         | 47% at 10 A g <sup>-1</sup>    | -                         | 9         |
| 3DG/ZnSe-SnSe <sub>2</sub>                         | 1515.2 at 1 A g <sup>-1</sup> | 3000, 90.1% (3 E)   | 64.5% at 20 A g <sup>-1</sup>  | 25.3                      | 10        |
| MnCo <sub>2</sub> O <sub>4</sub> @MoS <sub>2</sub> | 512 at 1 A g <sup>-1</sup>    | 5000, 99.57% (3 E)  |                                | 36                        | 11        |
| NiCo <sub>2</sub> S <sub>4</sub> @DCCNF)           | 1474 at 1 A g <sup>-1</sup>   | 5000, 90.2% (3 E)   | 80% at 20 A g <sup>-1</sup>    | 55.6                      | 12        |
| NF@MCFS-rGO                                        | 1830 at 1 A g <sup>-1</sup>   | 10000, 93.25% (3 E) | 78.5% at 25 A g <sup>-1</sup>  | 64.6                      | This work |

previously reported selenide based-electrodes.

## References

1 Y. Bai, W. Shen, K. Song, S. Zhang, Y. Wang, T. Xu, J. Xu, S. Dai and X. Wang, *J. Electroanal. Chem.*, 2021, **880**, 114795.

- 2 G. Tang, X. Zhang, B. Tian, P. Guo, J. Liang and W. Wu, *Chem. Eng. J.*, 2023, **471**, 144590.
- 3 G. Nabi, A. Riaz, A. Dahshan, M. Tanveer, M. Maraj and W. Ali, *Mater. Chem. Phys.* Volume 2024, 314, n128944.
- 4 R. Xie, S. Liu, Y. Rao, A. Karim, X. Qi, H. Huang and H. Xuan, *J. Alloys Compd.* 2023, 969, 172368.
- 5 S. Wang and S. Ma, *Dalton Trans.*, 2019, **48**, 3906–3913.
- 6 M, Manigandan and P. R. Vanga, *J. Energy Storage* 2024, **100**, 113783.
- 7 C. Miao, X. Xiao, Y. Gong, K. Zhu, K. Cheng, K. Ye, J. Yan, D. Cao, G. Wang and P. Xu, *ACS Appl. Mater. Interfaces*, 2020, **12**, 9365–9375.
- 8 B. Pandit and B. R. Sankapal, *ACS Appl. Nano Mater.* 2022, **5**, 3007–3017.
- 9 X. Liu, D. Zhang, Y. Ma, G. Li, X. Yuan, Y. Huang, G. Liu, M. Guo and W. Zheng, *ACS Appl. Nano Mater.* 2024, **7**, 8880–8889.
- 10 T. Zhao, G. Feng, L. Zhou, X. Wang, X. Li, F. Jiang, H. Li, Y. Liu, Q. Yu, H. Cao, Y. Xu and Y. Zhu, *ACS Appl. Nano Mater.* 2024, **7**, 13434–13446.
- 11 P. S. Shukla, A. Agrawal, A. Gaur and G. D. Varma, *J. Energy Storage* 2023, 59, 106580.
- 12 Y. Xiao, J. Huang, Y. Xu, H. Zhu, K. Yuan and Y. Chen, *J. Mater. Chem. A*, 2018, **6**, 9161-9171.
